# Supplementary material for: A novel sheet 4f–3d mixed-metal pyridine dicarboxylate: synthesis, structure, photophysical properties and its transformation to a perovskite oxide
Source: Royal Society of Chemistry journal article supplement (doi:10.1039/b509588c), 2005-01-01
Supplement: b509588c.pdf [file b509588c.pdf]

# Supplementary Material (ESI) for Chemical Communications  
# This journal is © The Royal Society of Chemistry 2005

1

**A Novel Sheet 4*f*-3*d* Mixed-Metal Pyridine  
Dicarboxylate: Synthesis, Structure, Photophysical  
Properties and its Transformation to a Perovskite  
Oxide**

**Partha Mahata,<sup>a</sup> Gopinathan Sankar,<sup>b</sup> Giridhar Madras<sup>c\*</sup> and Srinivasan Natarajan<sup>a\*</sup>**

**Electronic Supplementary Materials**

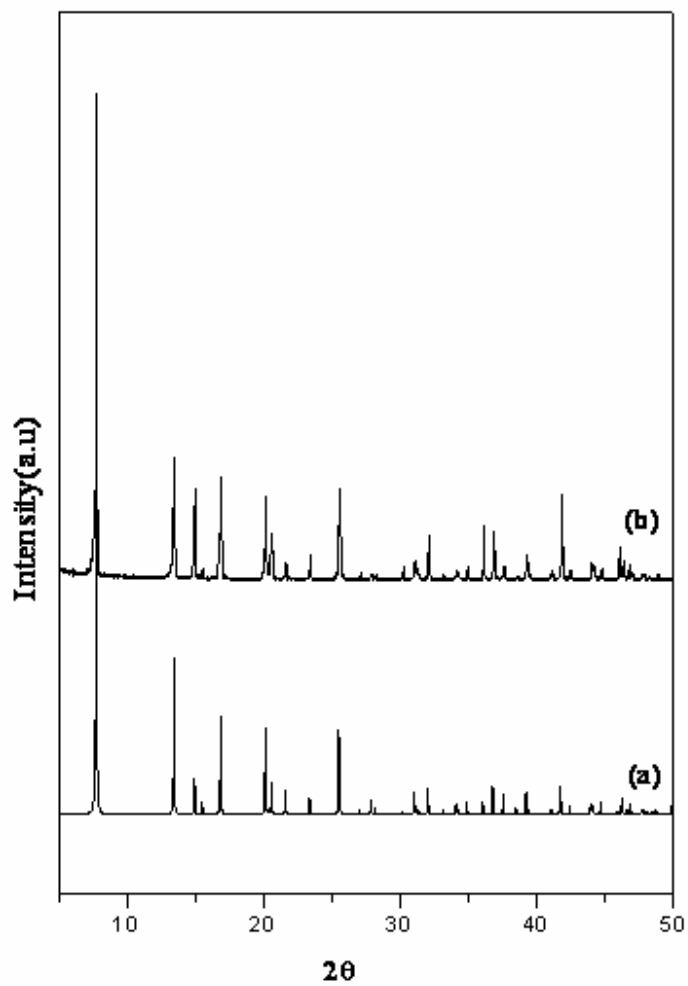

ESI-Fig-1. Powder XRD pattern (Cu  $K\alpha$ ) of I. (a) Simulated, (b) Experimental

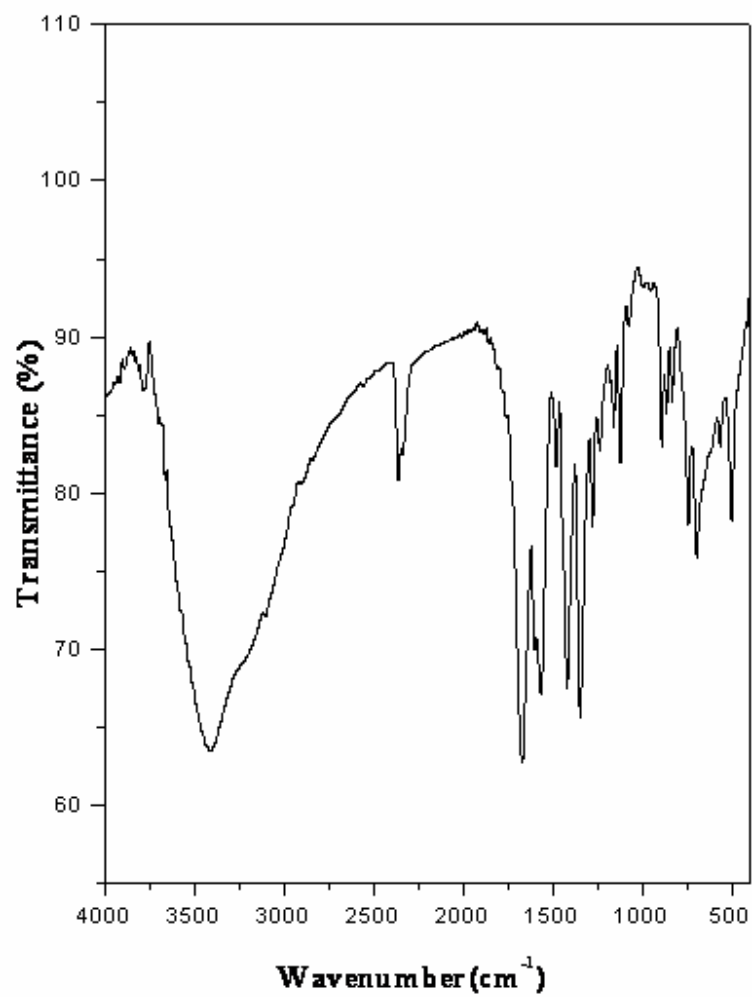

ESI-Fig-2. Infra-red spectra of I

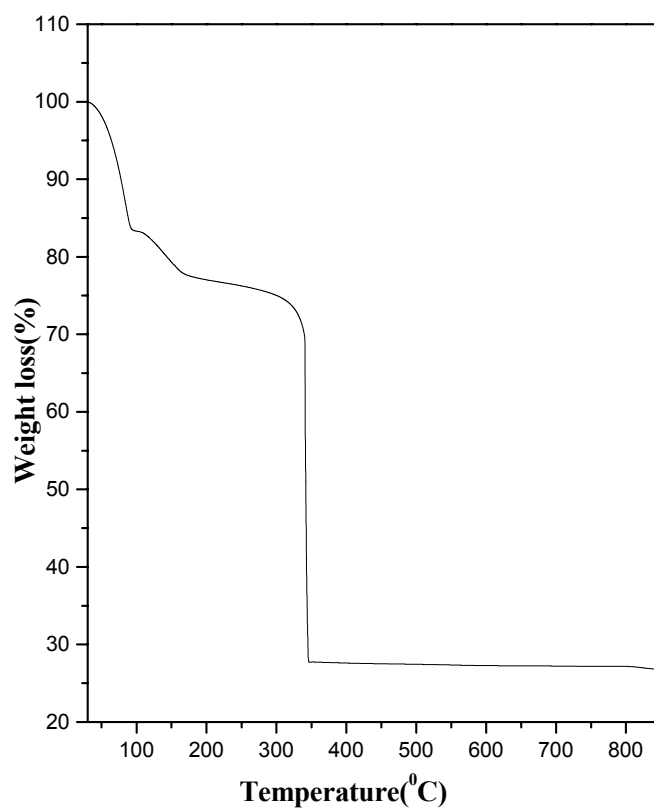

ESI-Fig-3. TGA studies of **I**

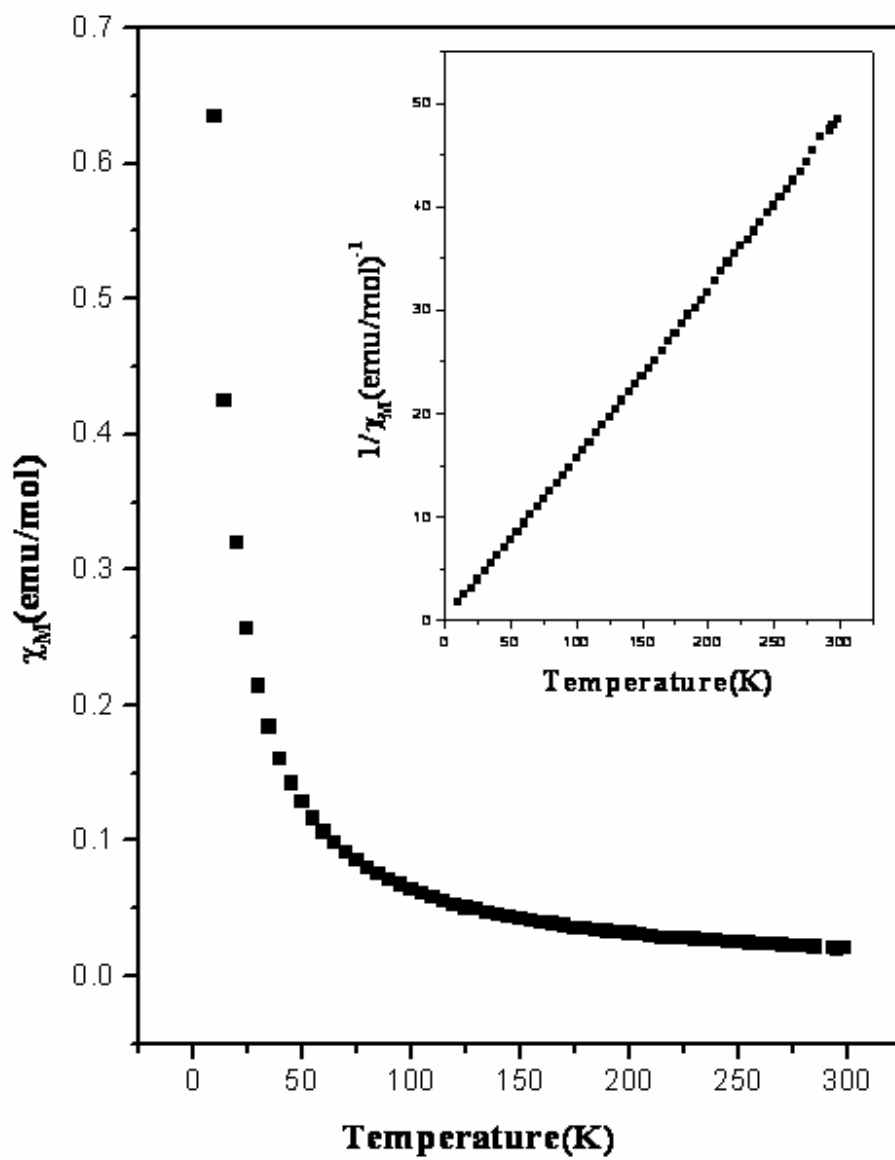

ESI-Fig-4. The thermal variation of  $\chi_M$  for I. Inset shows the  $1/\chi_M$  vs. T plot

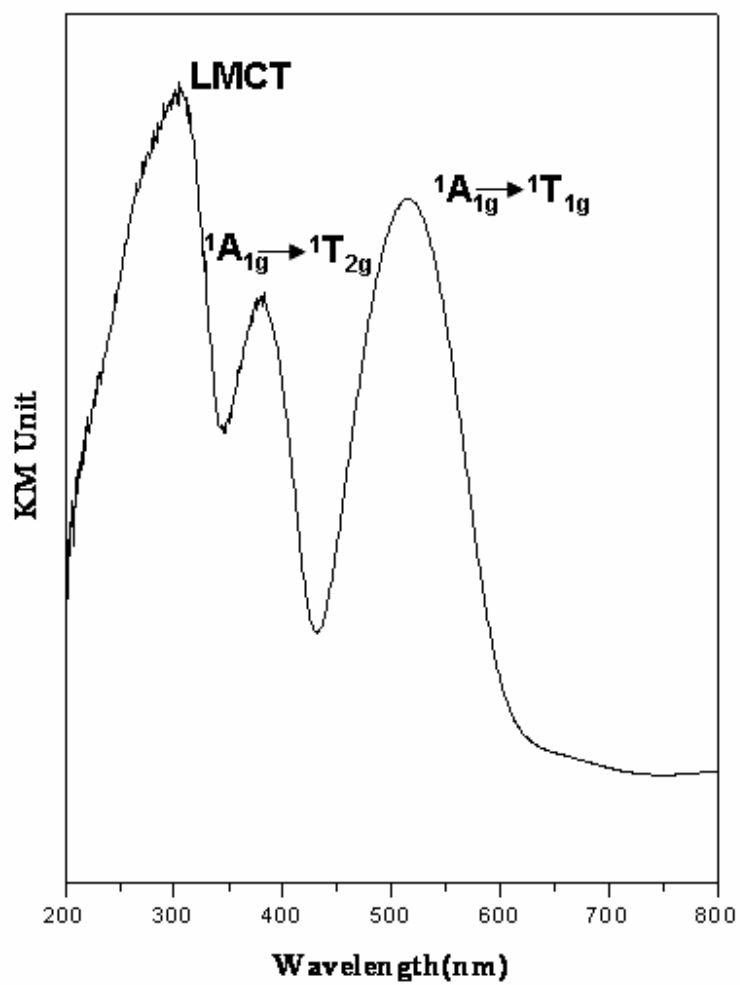

ESI-Fig-5. The room temperature UV-Vis spectra for I.

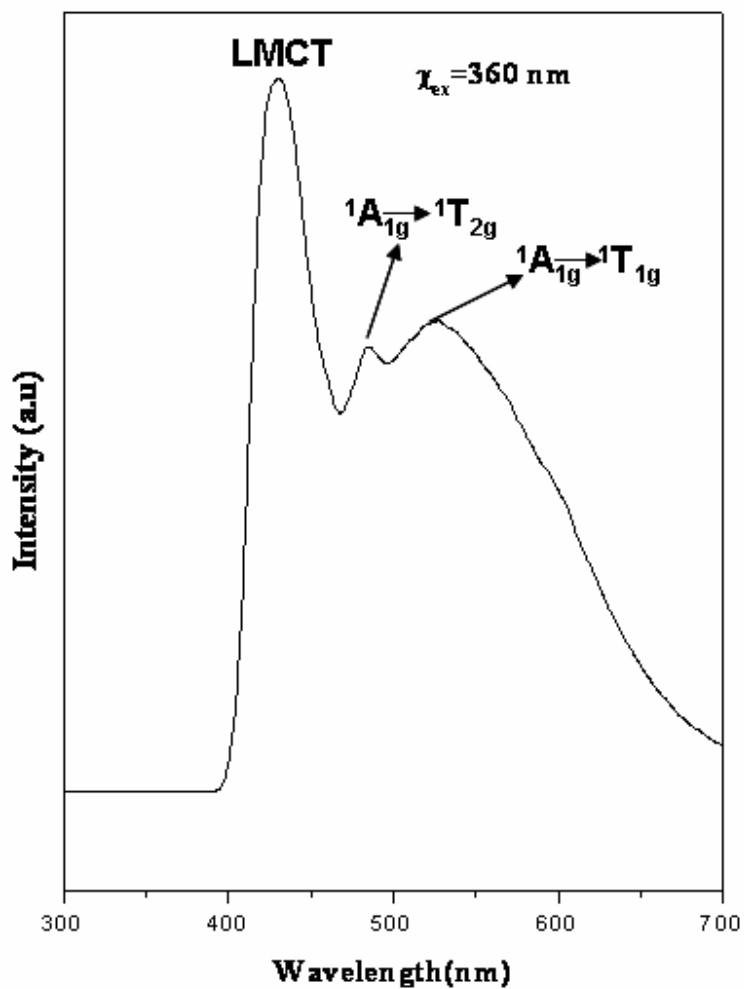

ESI-Fig-6. The room temperature photoluminescence for I.
